# Supplementary material
Source: publisher figshare collection journal article supplement (https://springernature.figshare.com/ndownloader/files/44931628)
Supplement: Supplementary file 1 [file 44931628]

## Sheet: Fig 2a
Figure 2a
	Time (h)	Water flux (LHM)		Time (h)	Reverse salt flux (GHM)
	0	-		0	-
	1	17.2		1	125.147
	2	16.5		2	123.748
	3	15.8		3	118.554
	4	15.2		4	118.008
	5	14.8		5	118.579
	6	17.1
	7	16.6
	8	16.1
	9	15.7
	10	15
	11	17.6
	12	16.6
	13	16.1
	14	15.7
	15	15.1
	16	16.8
	17	16.2
	18	15.7
	19	15.3
	20	14.8
	21	17.5
	22	16.5
	23	15.8
	24	15.2
	25	14.7

## Sheet: Fig 2b
Figure 2b
	Time (h)	Water flux (LHM) Used membrane	Std Dev	Water flux (LHM) Pristine membrane	Std Dev
	1	25.36	0.06	26.67	0.38
	2	24.92	0.18	26.19	0.35
	3	24.59	0.2	25.8	0.25
	4	24.34	0.23	25.49	0.24
	5	24.09	0.28	25.15	0.2
	Time (h)	Reverse salt flux (GHM) Used membrane	Std Dev	Reverse salt flux (GHM) Pristine membrane	Std Dev
	1	13.42	0.86	14.26	0.21
	2	13.78	0.33	14.26	0.14
	3	14.58	0.43	14.89	0.11
	4	14.81	0.29	15.47	0.14
	5	15.31	0.27	15.69	0.05

## Sheet: Fig 2e
Figure 2e
		Rejection (%) Sodium acetate	Rejection (%) Ammonia	Rejection (%) Sodium chloride
	1st cycle	84.54	65.26	98.64
	2nd cycle	86.59	62.25	98.48
	3rd cycle	85.29	64.4	97.65
	4th cycle	83.52	60.88	98.68
	5th cycle	83.16	60.16	98.53

## Sheet: Fig 2f
Figure 2f
	Voltage (V)	Current density KOH (mA/cm2)	Std Dev	Current density KOH+chloride (mA/cm2)	Std Dev	Current density KOH+ammonia (mA/cm2)	Std Dev	Current density KOH+sodium acetate (mA/cm2)	Std Dev	Current density KOH+permeate (mA/cm2)	Std Dev
	1.5	8.75	1.25	5.83333	0.39284	7.5	1.66667	5.83333	1.17851	6.66667	1.80021
	1.6	17.5	0.83333	12.0833	1.03935	15.4167	0.41667	13.3333	1.17851	15.2778	2.83279
	1.7	52.0833	0.41667	40.8333	6.46691	50	1.66667	41.3889	2.18722	46.1111	7.27544
	1.8	142.917	0.41667	117.5	14.2941	147.083	12.9167	121.111	6.81547	127.778	14.8501
	1.9	277.917	7.08333	243.75	23.7106	294.583	2.08333	260.278	17.5638	256.389	18.3754
	2	415.417	1.25	390.417	27.3551	421.25	3.75	410.833	17.8341	411.111	7.3388

## Sheet: Fig 3b
Figure 3b
	Concentration gradient (ΔC, mol/L)	icell/S deionised water A/cm2	icell/S wastewater effluent A/cm2
	0	0	0
	0.2	0.31	0.1906
	0.4	0.62	0.3812
	0.6	0.93	0.5718
	0.8	1.24	0.7624
	1	1.55	0.953
	1.2	1.86	1.1436
	1.4	2.17	1.3342
	1.6	2.48	1.5248
	1.8	2.79	1.7154
	2	3.1	1.906

## Sheet: Fig 3c
Figure 3c
	Time (h)	Water flux (LHM) deionised water	Water flux (LHM) wastewater effluent		Time (h)	Concentration gradient (ΔC, mol/L) deionised water	Concentration gradient (ΔC, mol/L) wastewater effluent
	1	26.6	17.8		0	1	1
	2	27.1	17.4		0.08333	0.98421	0.98421
	3	26.6	17		0.16667	0.93939	0.93939
	4	25.8	16		0.25	0.95072	0.95072
	5	25.5	16		0.33333	0.95958	0.95958
	6	27.2	16.9		0.41667	0.96352	0.96352
	7	27	15.8		0.5	0.96597	0.96597
	8	27.1	15.2		0.58333	0.96794	0.96794
	9	26	15.1		0.66667	0.96744	0.96744
	10	26.6	14.8		0.75	0.96743	0.96743
					0.83333	0.96939	0.96939
					0.91667	0.96888	0.96888
					1	0.96887	0.96887
					1.08333	0.97034	0.97034
					1.16667	0.97279	0.97279
					1.25	0.96539	0.96539
					1.33333	0.97325	0.97325
					1.41667	0.97076	0.97076
					1.5	0.96877	0.96877
					1.58333	0.96973	0.96973
					1.66667	0.97069	0.97069
					1.75	0.96869	0.96869
					1.83333	0.97063	0.97063
					1.91667	0.97207	0.97207
					2	0.97352	0.97352
					2.08333	0.97102	0.97102
					2.16667	0.97049	0.97049
					2.25	0.97192	0.97192
					2.33333	0.97089	0.97089
					2.41667	0.97036	0.97036
					2.5	0.9693	0.9693
					2.58333	0.97022	0.97022
					2.66667	0.97066	0.97066
					2.75	0.96913	0.96913
					2.83333	0.97006	0.97006
					2.91667	0.97096	0.97096
					3	0.9709	0.9709
					3.08333	0.97128	0.97128
					3.16667	0.97072	0.97072
					3.25	0.97015	0.97015
					3.33333	0.9691	0.9691
					3.41667	0.96945	0.96945
					3.5	0.97038	0.97038
					3.58333	0.97125	0.97125
					3.66667	0.97064	0.97064
					3.75	0.97056	0.97056
					3.83333	0.97148	0.97148
					3.91667	0.97091	0.97091
					4	0.96931	0.96931
					4.08333	0.9712	0.9712
					4.16667	0.97006	0.97006
					4.25	0.96992	0.96992
					4.33333	0.9693	0.9693
					4.41667	0.96975	0.96975
					4.5	0.97056	0.97056
					4.58333	0.97044	0.97044
					4.66667	0.96927	0.96927
					4.75	0.96912	0.96912
					4.83333	0.96998	0.96998
					4.91667	0.96795	0.96795
					5	0.96975	0.96975
					5.08	0.9802	0.99998
					5.17	0.997	0.96845
					5.25	0.96999	0.97732
					5.33	0.96491	0.98077
					5.42	0.97179	0.98175
					5.5	0.97262	0.98126
					5.58	0.97649	0.98323
					5.67	0.97835	0.98274
					5.75	0.97613	0.98471
					5.83	0.97803	0.98471
					5.92	0.97731	0.9852
					6	0.97856	0.98323
					6.08	0.97639	0.98471
					6.17	0.98005	0.9852
					6.25	0.98182	0.99013
					6.33	0.97613	0.9852
					6.42	0.97696	0.98421
					6.5	0.98147	0.9852
					6.58	0.97883	0.9852
					6.67	0.96278	0.9852
					6.75	0.96494	0.9852
					6.83	0.96596	0.9852
					6.92	0.96474	0.9852
					7	0.9662	0.9852
					7.08	0.96709	0.9852
					7.17	0.96453	0.9852
					7.25	0.96545	0.9852
					7.33	0.96592	0.9852
					7.42	0.96393	0.9852
					7.5	0.96253	0.9852
					7.58	0.96528	0.9852
					7.67	0.96525	0.9852
					7.75	0.9641	0.9852
					7.83	0.96448	0.9852
					7.92	0.96321	0.9852
					8	0.96111	0.9852
					8.08	0.96178	0.9852
					8.17	0.96079	0.9852
					8.25	0.96336	0.9852
					8.33	0.95997	0.99013
					8.42	0.96176	0.99013
					8.5	0.96089	0.99013
					8.58	0.96089	0.99013
					8.67	0.96064	0.9852
					8.75	0.95965	0.9852
					8.83	0.96166	0.99013
					8.92	0.95771	0.99013
					9	0.95734	0.99013
					9.08	0.95948	0.9852
					9.17	0.96028	0.9852
					9.25	0.95959	0.9852
					9.33	0.95945	0.9852
					9.42	0.96123	0.9852
					9.5	0.95788	0.9852
					9.58	0.95745	0.9852
					9.67	0.95762	0.9852
					9.75	0.95469	0.9852
					9.83	0.95751	0.9852
					9.92	0.95601	0.9852
					10	0.95684	0.9852

## Sheet: Fig 3d
Figure 3d
		H2 production rate (L/day)	Std Dev	H2 purity (%)	Std Dev
	Deionised water	77.3	0.02	99.2	0.00205
	Wastewater effluent	49.2	0.06	99.7	0.023

## Sheet: Fig 3e
Figure 3e
		Resulting voltage (V)
	Time (h)	Deionised water	Wastewater effluent		Time (h)	Faradaic Efficiency (%)
	0	1.82	1.774		1	99.2
	0.08333	1.8	1.76		2	99.5
	0.16667	1.814	1.764		3	99.4
	0.25	1.818	1.766		4	100
	0.33333	1.812	1.77		5	99.77
	0.41667	1.812	1.774		6	99.34
	0.5	1.814	1.776		7	99.81
	0.58333	1.814	1.776		8	99.2
	0.66667	1.816	1.778		9	99.12
	0.75	1.818	1.778		10	99.3
	0.83333	1.82	1.778
	0.91667	1.816	1.78
	1	1.816	1.762
	1.08333	1.816	1.766
	1.16667	1.824	1.766
	1.25	1.824	1.77
	1.33333	1.824	1.774
	1.41667	1.824	1.778
	1.5	1.826	1.78
	1.58333	1.828	1.782
	1.66667	1.828	1.784
	1.75	1.828	1.786
	1.83333	1.83	1.786
	1.91667	1.83	1.786
	2	1.83	1.786
	2.08333	1.83	1.786
	2.16667	1.83	1.786
	2.25	1.832	1.786
	2.33333	1.832	1.788
	2.41667	1.834	1.788
	2.5	1.834	1.788
	2.58333	1.834	1.788
	2.66667	1.834	1.788
	2.75	1.834	1.788
	2.83333	1.836	1.788
	2.91667	1.836	1.788
	3	1.836	1.788
	3.08333	1.836	1.788
	3.16667	1.836	1.788
	3.25	1.836	1.788
	3.33333	1.836	1.788
	3.41667	1.836	1.788
	3.5	1.836	1.788
	3.58333	1.836	1.788
	3.66667	1.836	1.79
	3.75	1.84	1.79
	3.83333	1.84	1.79
	3.91667	1.84	1.79
	4	1.84	1.79
	4.08333	1.836	1.79
	4.16667	1.844	1.79
	4.25	1.844	1.79
	4.33333	1.844	1.79
	4.41667	1.844	1.79
	4.5	1.844	1.79
	4.58333	1.844	1.79
	4.66667	1.844	1.79
	4.75	1.844	1.79
	4.83333	1.844	1.79
	4.91667	1.844	1.79
	5	1.844	1.79
	5.08	1.8	1.756
	5.17	1.792	1.76
	5.25	1.804	1.76
	5.33	1.81	1.768
	5.42	1.816	1.772
	5.5	1.822	1.772
	5.58	1.826	1.774
	5.67	1.826	1.774
	5.75	1.83	1.776
	5.83	1.832	1.776
	5.92	1.834	1.776
	6	1.836	1.776
	6.08	1.838	1.776
	6.17	1.84	1.776
	6.25	1.842	1.778
	6.33	1.844	1.78
	6.42	1.846	1.78
	6.5	1.846	1.78
	6.58	1.848	1.78
	6.67	1.846	1.78
	6.75	1.848	1.782
	6.83	1.848	1.782
	6.92	1.85	1.782
	7	1.85	1.782
	7.08	1.85	1.782
	7.17	1.85	1.782
	7.25	1.85	1.782
	7.33	1.85	1.782
	7.42	1.85	1.782
	7.5	1.852	1.782
	7.58	1.854	1.782
	7.67	1.854	1.782
	7.75	1.854	1.782
	7.83	1.856	1.782
	7.92	1.856	1.782
	8	1.856	1.782
	8.08	1.858	1.782
	8.17	1.858	1.782
	8.25	1.86	1.782
	8.33	1.86	1.784
	8.42	1.86	1.784
	8.5	1.86	1.784
	8.58	1.86	1.784
	8.67	1.86	1.784
	8.75	1.86	1.784
	8.83	1.86	1.784
	8.92	1.86	1.784
	9	1.86	1.784
	9.08	1.86	1.784
	9.17	1.86	1.784
	9.25	1.86	1.784
	9.33	1.86	1.784
	9.42	1.86	1.786
	9.5	1.86	1.786
	9.58	1.86	1.788
	9.67	1.86	1.788
	9.75	1.86	1.788
	9.83	1.86	1.788
	9.92	1.86	1.788
	10	1.86	1.788

## Sheet: Fig 3f
Figure 3f
	Time (h)	Water flux (LHM)	Voltage (V)	Concentration gradient (M)
	24	15.63	1.75	0.99
	48	14.64	1.8	0.998
	72	14.46	1.82	0.97
	96	13.97	1.82	0.96
	120	13.86	1.82	0.96
	144	13.69	1.82	0.96
	168	13.71	1.82	0.95

## Sheet: Fig 4a
Fig 4a
		H2 flux (Nm3/day/m2)
	SES	4.416
	FOWS	32.16
	FOWS(AWE)	448.08

[truncated: 16 more sheets: Fig 4b, Fig 4c, SI Fig 1, SI Fig 2, SI Fig 4, SI Fig 5, SI Fig 6, SI Fig 7, SI Fig 9, SI Fig 10, SI Fig 11a, SI Fig 11b, SI Fig 11c, SI Fig 11d, SI Fig 13, SI Fig 14]
